# Supplementary material for: Construction of Ni@polypyrrole nanochains/Ti3C2Txternary composites with excellent microwave absorption properties
Source: Royal Society of Chemistry journal article supplement (doi:10.1039/d2qm00672c), 2022-01-01
Supplement: d2qm00672c1.pdf [file d2qm00672c1.pdf]

## Supporting information

### **Construction of Ni@polypyrrole nanochains/Ti<sub>3</sub>C<sub>2</sub>T<sub>x</sub> ternary composites with excellent microwave absorption properties**

Bo Dai<sup>1</sup>, Feng Dong<sup>1</sup>, Jia Yu<sup>1</sup>, Shixuan Feng<sup>1</sup>, Haowen Wang<sup>1</sup>, Tingxi Li<sup>\*,1</sup>, Mingliang Ma<sup>2,\*</sup>,

Jianxu Ding<sup>1</sup>, Yong Ma<sup>\*,1</sup>

<sup>1</sup> School of Material Science and Engineering, Shandong University of Science and Technology,

Qingdao 266590, P. R. China

<sup>2</sup> School of Civil Engineering, Qingdao University of Technology, Qingdao 266033, P.R. China

\* Corresponding author: litx@sdust.edu.cn (T. Li); mamingliang@qut.edu.cn (M. Ma);

mayong@sdust.edu.cn (Y. Ma)

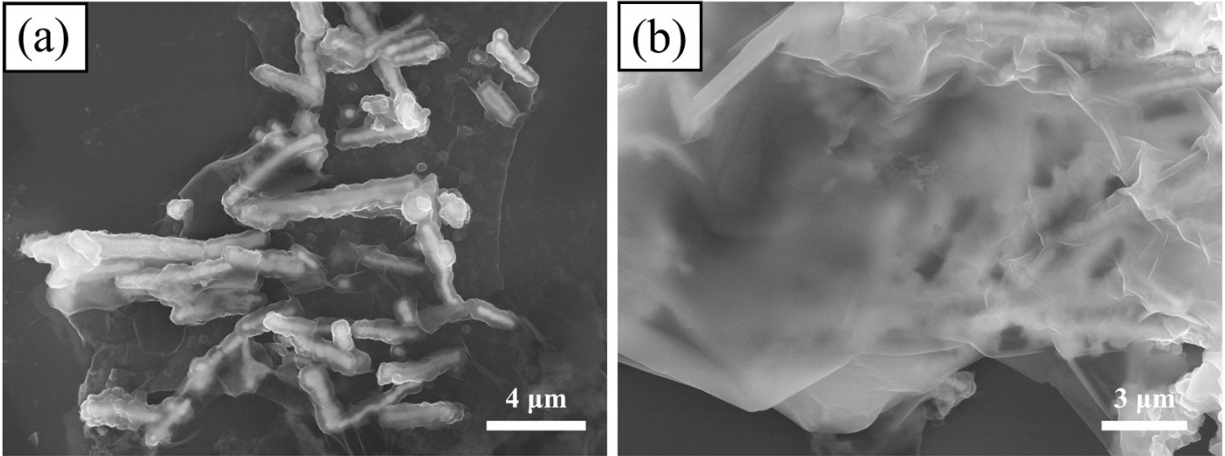

Fig. S1 The SEM images of (a) NIPM1 and (b) NIPM3.
